# Supplementary material for: T-cell co-stimulation in combination with targeting FAK drives enhanced anti-tumor immunity
Source: eLife. 2020 Jan 21;9:e48092. doi: 10.7554/eLife.48092 (PMC6974352; doi:10.7554/eLife.48092)
Supplement: Figure 3—source data 1. [file elife-48092-fig3-data1.xlsx]

## Sheet: Sheet2
Probe Name	Accession #	NS Probe ID	Class Name	Analyte Type	SCC 6.2	SCC7.1
Mme	NM_008604.3	NM_008604.3:285	Endogenous	mRNA	4.99	1514.94
Thbd	NM_009378.3	NM_009378.3:2845	Endogenous	mRNA	23.93	6061.28
Il1rl1	NM_001025602.2	NM_001025602.2:815	Endogenous	mRNA	53.85	9713.97
Cd80	NM_009855.2	NM_009855.2:210	Endogenous	mRNA	11.97	1596.04
Igf2r	NM_010515.1	NM_010515.1:2585	Endogenous	mRNA	34.90	4053.61
Cd34	NM_001111059.1	NM_001111059.1:560	Endogenous	mRNA	280.21	22320.09
Fez1	NM_183171.4	NM_183171.4:426	Endogenous	mRNA	15.96	739.11
Ctsh	NM_007801.2	NM_007801.2:1090	Endogenous	mRNA	13.96	486.62
Lrrn3	NM_010733.2	NM_010733.2:1765	Endogenous	mRNA	2.99	97.94
Itgb4	NM_001005608.2	NM_001005608.2:3355	Endogenous	mRNA	48.86	1510.35
Ptgs2	NM_011198.3	NM_011198.3:675	Endogenous	mRNA	1274.42	36148.88
Il18rap	NM_010553.2	NM_010553.2:2055	Endogenous	mRNA	10.97	299.93
Il3ra	NM_008369.1	NM_008369.1:567	Endogenous	mRNA	40.89	824.80
Arg1	NM_007482.3	NM_007482.3:626	Endogenous	mRNA	5.98	110.18
Pvr	NM_027514.2	NM_027514.2:962	Endogenous	mRNA	428.80	4289.26
Cdkn1a	NM_007669.4	NM_007669.4:1670	Endogenous	mRNA	703.03	6801.92
Tigit	NM_001146325.1	NM_001146325.1:730	Endogenous	mRNA	127.64	1218.07
Cxcl15	NM_011339.2	NM_011339.2:419	Endogenous	mRNA	1.99	13.77
Pou2f2	NM_001163556.1	NM_001163556.1:52	Endogenous	mRNA	1.99	13.77
Itga2	NM_008396.2	NM_008396.2:1860	Endogenous	mRNA	8.97	61.21
F2rl1	NM_007974.4	NM_007974.4:994	Endogenous	mRNA	6.98	47.44
Il1rap	NM_008364.2	NM_008364.2:2415	Endogenous	mRNA	333.07	2143.87
Ctsl	NM_009984.3	NM_009984.3:45	Endogenous	mRNA	3336.64	20549.60
Tnfrsf4	NM_011659.2	NM_011659.2:320	Endogenous	mRNA	16.95	104.06
Prdm1	NM_007548.3	NM_007548.3:1440	Endogenous	mRNA	1.00	6.12
Jun	NM_010591.2	NM_010591.2:2212	Endogenous	mRNA	748.90	4531.04
Tnfsf11	NM_011613.3	NM_011613.3:615	Endogenous	mRNA	2.99	16.83
Tnfrsf11a	NM_009399.3	NM_009399.3:692	Endogenous	mRNA	13.96	78.04
Ccl27a	NM_001048179.1	NM_001048179.1:265	Endogenous	mRNA	4.99	26.01
Plaur	NM_011113.3	NM_011113.3:1085	Endogenous	mRNA	931.39	4752.93
Klra4	NM_010649.3	NM_010649.3:169	Endogenous	mRNA	62.82	290.75
Hsd11b1	NM_008288.2	NM_008288.2:110	Endogenous	mRNA	5.98	27.54
C1qb	NM_009777.2	NM_009777.2:865	Endogenous	mRNA	1.00	4.59
Fn1	NM_010233.1	NM_010233.1:2627	Endogenous	mRNA	19936.05	86380.55
Ikzf2	NM_011770.4	NM_011770.4:7230	Endogenous	mRNA	16.95	70.39
Abca1	NM_013454.3	NM_013454.3:6865	Endogenous	mRNA	191.46	791.13
Tlr1	NM_030682.1	NM_030682.1:805	Endogenous	mRNA	6.98	27.54
Myc	NM_010849.4	NM_010849.4:630	Endogenous	mRNA	14807.44	56251.65
Klra27	XM_916590.3	XM_916590.3:496	Endogenous	mRNA	16.95	64.27
Ccl28	NM_020279.3	NM_020279.3:234	Endogenous	mRNA	4.99	18.36
Il13	NM_008355.2	NM_008355.2:425	Endogenous	mRNA	4.99	18.36
Mill2	NM_153760.2	NM_153760.2:22	Endogenous	mRNA	15.96	58.15
Cd2	XM_006500959.1	XM_006500959.1:82	Endogenous	mRNA	2.99	10.71
Gzmb	NM_013542.2	NM_013542.2:1020	Endogenous	mRNA	2.99	10.71
Il11	NM_008350.2	NM_008350.2:285	Endogenous	mRNA	5.98	21.42
Il24	NM_053095.2	NM_053095.2:545	Endogenous	mRNA	2.99	10.71
Thbs1	NM_011580.3	NM_011580.3:702	Endogenous	mRNA	1340.24	4800.37
Icosl	NM_015790.3	NM_015790.3:349	Endogenous	mRNA	20.94	74.98
Sigirr	NM_023059.3	NM_023059.3:800	Endogenous	mRNA	533.50	1794.97
Stat4	NM_011487.4	NM_011487.4:1816	Endogenous	mRNA	10.97	36.73
Il13ra1	NM_133990.4	NM_133990.4:845	Endogenous	mRNA	15.96	52.03
Msln	NM_018857.1	NM_018857.1:346	Endogenous	mRNA	537.49	1744.47
Cxcl9	NM_008599.2	NM_008599.2:40	Endogenous	mRNA	3.99	12.24
Il6	NM_031168.1	NM_031168.1:40	Endogenous	mRNA	7.98	24.48
Fap	NM_007986.2	NM_007986.2:530	Endogenous	mRNA	4.99	15.30
Rora	NM_013646.1	NM_013646.1:1045	Endogenous	mRNA	25.93	78.04
Egr1	NM_007913.5	NM_007913.5:515	Endogenous	mRNA	1911.64	5700.15
Ido1	NM_008324.1	NM_008324.1:521	Endogenous	mRNA	10.97	32.14
Pou2af1	NM_011136.2	NM_011136.2:1865	Endogenous	mRNA	9.97	29.07
Mx1	NM_010846.1	NM_010846.1:1078	Endogenous	mRNA	7.98	22.95
Bcl2l1	NM_009743.4	NM_009743.4:200	Endogenous	mRNA	1351.21	3883.75
Pparg	NM_011146.1	NM_011146.1:1060	Endogenous	mRNA	6.98	19.89
H2-T23	NM_010398.3	NM_010398.3:441	Endogenous	mRNA	461.70	1303.77
Bax	NM_007527.3	NM_007527.3:735	Endogenous	mRNA	700.04	1970.95
Nfatc2	NM_001037177.1	NM_001037177.1:1559	Endogenous	mRNA	5.98	16.83
Il12b	NM_008352.1	NM_008352.1:1045	Endogenous	mRNA	4.99	13.77
Itga2b	NM_010575.2	NM_010575.2:461	Endogenous	mRNA	19.94	53.56
Blk	NM_007549.2	NM_007549.2:2198	Endogenous	mRNA	3.99	10.71
Ccl12	NM_011331.2	NM_011331.2:56	Endogenous	mRNA	3.99	10.71
Ccl26	NM_001013412.2	NM_001013412.2:140	Endogenous	mRNA	3.99	10.71
Cd22	NM_001043317.2	NM_001043317.2:865	Endogenous	mRNA	3.99	10.71
Il2ra	NM_008367.2	NM_008367.2:325	Endogenous	mRNA	3.99	10.71
Itgb2	NM_008404.4	NM_008404.4:2542	Endogenous	mRNA	44.87	119.36
Egfr	NM_207655.2	NM_207655.2:1335	Endogenous	mRNA	31.91	84.16
Fcer2a	NM_001253737.1	NM_001253737.1:1770	Endogenous	mRNA	6.98	18.36
Card11	NM_175362.2	NM_175362.2:545	Endogenous	mRNA	5.98	15.30
Ccr6	NM_001190333.1	NM_001190333.1:660	Endogenous	mRNA	5.98	15.30
Ciita	NM_007575.2	NM_007575.2:1358	Endogenous	mRNA	5.98	15.30
Epsti1	NM_029495.2	NM_029495.2:26	Endogenous	mRNA	5.98	15.30
Prg2	NM_008920.4	NM_008920.4:119	Endogenous	mRNA	2.99	7.65
Slamf1	NM_013730.4	NM_013730.4:1770	Endogenous	mRNA	2.99	7.65
Slamf6	NM_030710.2	NM_030710.2:805	Endogenous	mRNA	5.98	15.30
Tnfrsf11b	NM_008764.3	NM_008764.3:35	Endogenous	mRNA	2.99	7.65
Alcam	NM_009655.1	NM_009655.1:2605	Endogenous	mRNA	900.47	2287.71
Ly96	NM_001159711.1	NM_001159711.1:64	Endogenous	mRNA	313.12	785.01
Tie1	NM_011587.2	NM_011587.2:2715	Endogenous	mRNA	7.98	19.89
Dusp6	NM_026268.2	NM_026268.2:1648	Endogenous	mRNA	4516.32	11089.65
Cfb	NM_008198.2	NM_008198.2:1685	Endogenous	mRNA	4.99	12.24
Mbl2	NM_010776.1	NM_010776.1:525	Endogenous	mRNA	4.99	12.24
Spink5	NM_001081180.1	NM_001081180.1:2863	Endogenous	mRNA	4.99	12.24
Il34	NM_001135100.1	NM_001135100.1:848	Endogenous	mRNA	631.23	1508.82
Mertk	NM_008587.1	NM_008587.1:1320	Endogenous	mRNA	28.92	67.33
Creb5	NM_172728.2	NM_172728.2:2415	Endogenous	mRNA	344.03	794.19
Ccl19	NM_011888.2	NM_011888.2:465	Endogenous	mRNA	5.98	13.77
Clec7a	NM_020008.2	NM_020008.2:1008	Endogenous	mRNA	5.98	13.77
Ikzf1	NM_001025597.1	NM_001025597.1:4420	Endogenous	mRNA	5.98	13.77
Il3	NM_010556.4	NM_010556.4:155	Endogenous	mRNA	5.98	13.77
Eomes	NM_010136.2	NM_010136.2:2665	Endogenous	mRNA	23.93	55.09
Btla	NM_001037719.2	NM_001037719.2:24	Endogenous	mRNA	7.98	18.36
H2-DMb2	NM_010388.4	NM_010388.4:195	Endogenous	mRNA	7.98	18.36
Hck	NM_010407.3	NM_010407.3:1874	Endogenous	mRNA	3.99	9.18
Il19	NM_001009940.1	NM_001009940.1:464	Endogenous	mRNA	3.99	9.18
Il1rl2	NM_133193.3	NM_133193.3:860	Endogenous	mRNA	11.97	27.54
Spp1	NM_009263.3	NM_009263.3:420	Endogenous	mRNA	182240.55	404268.16
Klra15	NM_013793.2	NM_013793.2:736	Endogenous	mRNA	8.97	19.89
Tnf	NM_013693.1	NM_013693.1:1135	Endogenous	mRNA	8.97	19.89
Il17ra	NM_008359.1	NM_008359.1:312	Endogenous	mRNA	538.49	1193.59
Akt3	NM_011785.3	NM_011785.3:2494	Endogenous	mRNA	1392.09	3084.97
Bcl6	NM_009744.3	NM_009744.3:185	Endogenous	mRNA	274.23	602.91
Klrk1	NM_001083322.1	NM_001083322.1:144	Endogenous	mRNA	6.98	15.30
Lif	NM_008501.2	NM_008501.2:3435	Endogenous	mRNA	359.99	777.36
Atg7	NM_028835.1	NM_028835.1:855	Endogenous	mRNA	423.81	910.49
Eng	NM_001146350.1	NM_001146350.1:574	Endogenous	mRNA	4.99	10.71
Ifi44l	NM_031367.1	NM_031367.1:1410	Endogenous	mRNA	4.99	10.71
Pik3cg	NM_020272.2	NM_020272.2:2890	Endogenous	mRNA	4.99	10.71
Ecsit	NM_001253897.1	NM_001253897.1:348	Endogenous	mRNA	191.46	408.57
Trem2	NM_031254.2	NM_031254.2:646	Endogenous	mRNA	15.96	33.67
Il7r	NM_008372.3	NM_008372.3:1020	Endogenous	mRNA	7.98	16.83
Cd68	NM_009853.1	NM_009853.1:636	Endogenous	mRNA	170.52	358.08
Map3k5	NM_008580.4	NM_008580.4:640	Endogenous	mRNA	743.91	1560.85
Il6ra	NM_010559.2	NM_010559.2:2825	Endogenous	mRNA	328.08	685.55
Cd3eap	NM_145822.2	NM_145822.2:1858	Endogenous	mRNA	134.62	278.50
C1qa	NM_007572.2	NM_007572.2:566	Endogenous	mRNA	2.99	6.12
Cd79b	NM_008339.2	NM_008339.2:330	Endogenous	mRNA	2.99	6.12
Cd8b1	NM_009858.2	NM_009858.2:1075	Endogenous	mRNA	5.98	12.24
Fasl	NM_010177.3	NM_010177.3:645	Endogenous	mRNA	2.99	6.12
H2-Eb1	NM_010382.2	NM_010382.2:935	Endogenous	mRNA	2.99	6.12
Mpo	NM_010824.2	NM_010824.2:1648	Endogenous	mRNA	8.97	18.36
Mst1r	NM_009074.1	NM_009074.1:3135	Endogenous	mRNA	5.98	12.24
Ly9	NM_008534.2	NM_008534.2:1190	Endogenous	mRNA	26.92	55.09
Serpinb2	NM_001174170.1	NM_001174170.1:715	Endogenous	mRNA	29.92	61.21
Itga6	NM_008397.3	NM_008397.3:910	Endogenous	mRNA	1574.58	3218.10
Tnfrsf10b	NM_020275.3	NM_020275.3:1625	Endogenous	mRNA	740.92	1507.29
Dock9	XM_976068.1	XM_976068.1:360	Endogenous	mRNA	596.33	1210.42
Thy1	NM_009382.3	NM_009382.3:425	Endogenous	mRNA	25.93	52.03
Dusp4	NM_176933.4	NM_176933.4:2200	Endogenous	mRNA	2818.09	5646.59
Cxcr4	NM_009911.3	NM_009911.3:704	Endogenous	mRNA	9.97	19.89
Cd33	NM_001111058.1	NM_001111058.1:405	Endogenous	mRNA	6.98	13.77
Icam4	NM_023892.2	NM_023892.2:540	Endogenous	mRNA	6.98	13.77
Inpp5d	NM_001110192.1	NM_001110192.1:2186	Endogenous	mRNA	10.97	21.42
Hras	NM_008284.2	NM_008284.2:1890	Endogenous	mRNA	38.89	74.98
Ifnl2	NM_001024673.2	NM_001024673.2:72	Endogenous	mRNA	7.98	15.30
Il2	NM_008366.3	NM_008366.3:314	Endogenous	mRNA	3.99	7.65
Il23a	NM_031252.1	NM_031252.1:360	Endogenous	mRNA	7.98	15.30
Tnfsf13b	NM_033622.1	NM_033622.1:225	Endogenous	mRNA	3.99	7.65
Txnip	NM_023719.1	NM_023719.1:2340	Endogenous	mRNA	1486.83	2817.17
Il1r2	NM_010555.4	NM_010555.4:458	Endogenous	mRNA	12.96	24.48
Vegfa	NM_001025250.3	NM_001025250.3:3015	Endogenous	mRNA	2715.38	5088.05
Crebbp	NM_001025432.1	NM_001025432.1:3770	Endogenous	mRNA	1531.70	2856.96
Twist1	NM_011658.2	NM_011658.2:994	Endogenous	mRNA	1773.02	3288.49
Egr3	NM_018781.2	NM_018781.2:518	Endogenous	mRNA	377.94	696.26
Vim	NM_011701.4	NM_011701.4:34	Endogenous	mRNA	45279.92	83404.24
Adora2a	NM_009630.2	NM_009630.2:2306	Endogenous	mRNA	9.97	18.36
Il15	NM_008357.2	NM_008357.2:854	Endogenous	mRNA	9.97	18.36
Tnfsf8	NM_009403.2	NM_009403.2:125	Endogenous	mRNA	9.97	18.36
Klra2	NM_001170851.1	NM_001170851.1:420	Endogenous	mRNA	79.78	146.90
Card9	NM_001037747.1	NM_001037747.1:210	Endogenous	mRNA	4.99	9.18
Il17a	NM_010552.3	NM_010552.3:205	Endogenous	mRNA	4.99	9.18
Pycard	NM_023258.4	NM_023258.4:1654	Endogenous	mRNA	4.99	9.18
Pvrl2	NM_001159724.1	NM_001159724.1:984	Endogenous	mRNA	769.84	1412.41
Egr2	NM_010118.2	NM_010118.2:1785	Endogenous	mRNA	35.90	65.80
Chuk	NM_001162410.1	NM_001162410.1:222	Endogenous	mRNA	1426.00	2592.23
Zfp13	NM_011747.2	NM_011747.2:419	Endogenous	mRNA	21.94	39.79
Cd180	NM_008533.2	NM_008533.2:860	Endogenous	mRNA	10.97	19.89
Hcst	NM_011827.3	NM_011827.3:166	Endogenous	mRNA	10.97	19.89
Cmah	NM_001111110.2	NM_001111110.2:664	Endogenous	mRNA	5.98	10.71
Cd247	NM_001113391.2	NM_001113391.2:215	Endogenous	mRNA	11.97	21.42
Itgb3	NM_016780.2	NM_016780.2:2595	Endogenous	mRNA	11.97	21.42
Lgals3	NM_001145953.1	NM_001145953.1:665	Endogenous	mRNA	35174.28	62288.45
Cd9	NM_007657.3	NM_007657.3:620	Endogenous	mRNA	6714.16	11837.94
Ccl6	NM_009139.2	NM_009139.2:825	Endogenous	mRNA	6.98	12.24
Lcp1	NM_001247984.1	NM_001247984.1:3344	Endogenous	mRNA	6.98	12.24
Ms4a2	NM_001276330.1	NM_001276330.1:104	Endogenous	mRNA	6.98	12.24
Tnfrsf18	NM_009400.2	NM_009400.2:840	Endogenous	mRNA	6.98	12.24
Cd200	NM_010818.3	NM_010818.3:686	Endogenous	mRNA	100.72	174.45
Il1a	NM_010554.4	NM_010554.4:225	Endogenous	mRNA	7.98	13.77
Masp2	NM_010767.3	NM_010767.3:363	Endogenous	mRNA	7.98	13.77
Cd81	NM_133655.2	NM_133655.2:575	Endogenous	mRNA	7415.19	12774.45
Runx1	NM_001111021.1	NM_001111021.1:3055	Endogenous	mRNA	2389.29	4087.27
Cd8a	NM_001081110.2	NM_001081110.2:355	Endogenous	mRNA	8.97	15.30
H2-Ab1	NM_207105.2	NM_207105.2:164	Endogenous	mRNA	8.97	15.30
Cd38	NM_007646.4	NM_007646.4:1490	Endogenous	mRNA	45.87	78.04
Lilra5	NM_001081239.2	NM_001081239.2:994	Endogenous	mRNA	18.95	32.14
Trp53	NM_011640.1	NM_011640.1:1835	Endogenous	mRNA	1367.16	2316.78
Il22ra1	NM_178257.1	NM_178257.1:685	Endogenous	mRNA	28.92	48.97
Il22ra2	NM_178258.5	NM_178258.5:20	Endogenous	mRNA	28.92	48.97
Cd163	NM_053094.2	NM_053094.2:3225	Endogenous	mRNA	9.97	16.83
Igf1r	NM_010513.2	NM_010513.2:3390	Endogenous	mRNA	1147.78	1923.51
Csf1r	NM_001037859.2	NM_001037859.2:1892	Endogenous	mRNA	21.94	36.73
Lag3	NM_008479.1	NM_008479.1:1700	Endogenous	mRNA	21.94	36.73
Cd86	NM_019388.3	NM_019388.3:251	Endogenous	mRNA	22.94	38.26
Tnfrsf13b	NM_021349.1	NM_021349.1:340	Endogenous	mRNA	11.97	19.89
Ifih1	NM_027835.2	NM_027835.2:1997	Endogenous	mRNA	36.90	61.21
Nos2	NM_010927.3	NM_010927.3:3715	Endogenous	mRNA	24.93	41.32
Abcg1	NM_009593.1	NM_009593.1:295	Endogenous	mRNA	37.89	62.74
Ccl22	NM_009137.2	NM_009137.2:1096	Endogenous	mRNA	13.96	22.95
Irf3	NM_016849.4	NM_016849.4:526	Endogenous	mRNA	701.03	1152.27
Smn1	NM_011420.2	NM_011420.2:390	Endogenous	mRNA	1429.99	2348.92
Cd27	NM_001033126.2	NM_001033126.2:235	Endogenous	mRNA	14.96	24.48
Tnfaip3	NM_009397.2	NM_009397.2:232	Endogenous	mRNA	195.45	316.76
Cd84	NM_001252472.1	NM_001252472.1:188	Endogenous	mRNA	17.95	29.07
Axl	NM_009465.3	NM_009465.3:3820	Endogenous	mRNA	8965.84	14469.96
Elk1	NM_007922.4	NM_007922.4:3070	Endogenous	mRNA	39.89	64.27
Il6st	NM_010560.2	NM_010560.2:2325	Endogenous	mRNA	1057.03	1701.63
Atg16l1	NM_001205391.1	NM_001205391.1:280	Endogenous	mRNA	838.65	1334.37
Reps1	NM_001111065.1	NM_001111065.1:294	Endogenous	mRNA	1566.60	2466.75
Cd274	NM_021893.2	NM_021893.2:515	Endogenous	mRNA	77.78	122.42
H2-Ob	NM_010389.3	NM_010389.3:1606	Endogenous	mRNA	122.66	192.81
Cd46	NM_010778.3	NM_010778.3:115	Endogenous	mRNA	8.97	13.77
Clec4n	NM_001190320.1	NM_001190320.1:441	Endogenous	mRNA	5.98	9.18
Foxj1	NM_008240.3	NM_008240.3:2179	Endogenous	mRNA	5.98	9.18
Pdcd1	NM_008798.1	NM_008798.1:1134	Endogenous	mRNA	5.98	9.18
Rag1	NM_009019.2	NM_009019.2:1945	Endogenous	mRNA	2.99	4.59
Tbx21	NM_019507.1	NM_019507.1:625	Endogenous	mRNA	20.94	32.14
Klra21	NM_053151.1	NM_053151.1:41	Endogenous	mRNA	12.96	19.89
Flt3	NM_010229.2	NM_010229.2:3302	Endogenous	mRNA	24.93	38.26
Cd3d	NM_013487.2	NM_013487.2:289	Endogenous	mRNA	31.91	48.97
Tnfrsf8	NM_009401.2	NM_009401.2:1275	Endogenous	mRNA	9.97	15.30
Cybb	NM_007807.2	NM_007807.2:1535	Endogenous	mRNA	6.98	10.71
Ifna2	NM_010503.2	NM_010503.2:89	Endogenous	mRNA	6.98	10.71
Itgax	NM_021334.2	NM_021334.2:327	Endogenous	mRNA	6.98	10.71
Kdr	NM_010612.2	NM_010612.2:995	Endogenous	mRNA	6.98	10.71
Cd3e	NM_007648.4	NM_007648.4:380	Endogenous	mRNA	17.95	27.54
Cr2	NM_007758.2	NM_007758.2:1650	Endogenous	mRNA	10.97	16.83
Dll4	NM_019454.2	NM_019454.2:542	Endogenous	mRNA	10.97	16.83
C8a	NM_146148.2	NM_146148.2:1022	Endogenous	mRNA	3.99	6.12
C8b	NM_133882.2	NM_133882.2:1200	Endogenous	mRNA	11.97	18.36
Ccl4	NM_013652.1	NM_013652.1:140	Endogenous	mRNA	7.98	12.24
Csf2rb	NM_007780.4	NM_007780.4:4185	Endogenous	mRNA	7.98	12.24
Igll1	NM_001190325.1	NM_001190325.1:690	Endogenous	mRNA	3.99	6.12
Il10ra	NM_008348.2	NM_008348.2:75	Endogenous	mRNA	3.99	6.12
Il23r	NM_144548.1	NM_144548.1:690	Endogenous	mRNA	3.99	6.12
Irak3	NM_028679.3	NM_028679.3:2608	Endogenous	mRNA	3.99	6.12
Glycam1	NM_008134.2	NM_008134.2:124	Endogenous	mRNA	4.99	7.65
Ccr5	NM_009917.5	NM_009917.5:1340	Endogenous	mRNA	1.00	1.53
Psma2	NM_008944.2	NM_008944.2:136	Endogenous	mRNA	5437.74	8304.62
Pin1	NM_023371.3	NM_023371.3:2480	Endogenous	mRNA	102.71	156.08
Rps6	NM_009096.3	NM_009096.3:1195	Endogenous	mRNA	2079.16	3140.05
Socs1	NM_009896.2	NM_009896.2:1020	Endogenous	mRNA	246.31	367.26
Gpr44	XM_006526695.1	XM_006526695.1:358	Endogenous	mRNA	25.93	38.26
Cd160	NM_001163496.1	NM_001163496.1:416	Endogenous	mRNA	23.93	35.20
Ccr1	NM_009912.4	NM_009912.4:1526	Endogenous	mRNA	20.94	30.60
Il13ra2	NM_008356.3	NM_008356.3:1010	Endogenous	mRNA	20.94	30.60
Psen2	NM_001128605.1	NM_001128605.1:560	Endogenous	mRNA	152.57	221.88
Tal1	NM_011527.2	NM_011527.2:2490	Endogenous	mRNA	17.95	26.01
Vwf	NM_011708.3	NM_011708.3:6354	Endogenous	mRNA	17.95	26.01
Gzmm	NM_008504.2	NM_008504.2:610	Endogenous	mRNA	16.95	24.48
Ltbr	NM_010736.3	NM_010736.3:1962	Endogenous	mRNA	977.26	1407.82
Gtf3c1	NM_207239.1	NM_207239.1:4586	Endogenous	mRNA	807.73	1156.86
Rorc	NM_011281.2	NM_011281.2:648	Endogenous	mRNA	58.83	84.16
Cd99	NM_025584.2	NM_025584.2:716	Endogenous	mRNA	609.29	867.65
C1qbp	NM_007573.2	NM_007573.2:630	Endogenous	mRNA	14313.83	20271.10
Tnfrsf12a	NM_001161746.1	NM_001161746.1:517	Endogenous	mRNA	5775.79	8114.87
Serping1	NM_009776.3	NM_009776.3:1480	Endogenous	mRNA	34.90	48.97
Aire	NM_009646.1	NM_009646.1:656	Endogenous	mRNA	22.94	32.14
C2	NM_013484.2	NM_013484.2:2359	Endogenous	mRNA	10.97	15.30
Cd79a	NM_007655.3	NM_007655.3:1175	Endogenous	mRNA	10.97	15.30
Csf2	NM_009969.4	NM_009969.4:732	Endogenous	mRNA	10.97	15.30
Fcer1a	NM_010184.1	NM_010184.1:114	Endogenous	mRNA	21.94	30.60
Smad2	NM_010754.4	NM_010754.4:880	Endogenous	mRNA	520.54	719.21
Apoe	NM_009696.3	NM_009696.3:129	Endogenous	mRNA	9.97	13.77
Cd5	NM_007650.3	NM_007650.3:1395	Endogenous	mRNA	9.97	13.77
Ctss	NM_021281.2	NM_021281.2:740	Endogenous	mRNA	9.97	13.77
Pax5	NM_008782.2	NM_008782.2:90	Endogenous	mRNA	9.97	13.77
H2-DMb1	NM_010387.2	NM_010387.2:1089	Endogenous	mRNA	8.97	12.24
Icam2	NM_010494.1	NM_010494.1:375	Endogenous	mRNA	8.97	12.24
Itgae	NM_008399.1	NM_008399.1:775	Endogenous	mRNA	26.92	36.73
Col3a1	NM_009930.1	NM_009930.1:4370	Endogenous	mRNA	8288.74	11285.52
Icam1	NM_010493.2	NM_010493.2:2195	Endogenous	mRNA	39.89	53.56
Ambp	NM_007443.3	NM_007443.3:410	Endogenous	mRNA	7.98	10.71
Elane	NM_015779.2	NM_015779.2:491	Endogenous	mRNA	7.98	10.71
Ifnb1	NM_010510.1	NM_010510.1:335	Endogenous	mRNA	7.98	10.71
Klra3	NM_010648.2	NM_010648.2:7	Endogenous	mRNA	7.98	10.71
Tollip	NM_023764.3	NM_023764.3:260	Endogenous	mRNA	1480.84	1984.72
Rela	NM_009045.4	NM_009045.4:645	Endogenous	mRNA	697.04	931.92
Nfatc1	NM_016791.4	NM_016791.4:1570	Endogenous	mRNA	141.60	188.22
Mapk1	NM_011949.3	NM_011949.3:2640	Endogenous	mRNA	3484.22	4628.98
Anxa1	NM_010730.2	NM_010730.2:400	Endogenous	mRNA	8943.90	11851.71
Litaf	NM_019980.1	NM_019980.1:1100	Endogenous	mRNA	1146.78	1513.41
St6gal1	NM_001252506.1	NM_001252506.1:1564	Endogenous	mRNA	333.07	439.18
Il21r	NM_021887.1	NM_021887.1:619	Endogenous	mRNA	6.98	9.18
Mefv	NM_001161790.1	NM_001161790.1:928	Endogenous	mRNA	6.98	9.18
Siglec1	NM_011426.3	NM_011426.3:4550	Endogenous	mRNA	6.98	9.18
Itgb1	NM_010578.1	NM_010578.1:1855	Endogenous	mRNA	13851.13	18193.03
Mapk3	NM_011952.2	NM_011952.2:825	Endogenous	mRNA	2666.52	3484.36
Syk	NM_001198977.1	NM_001198977.1:2064	Endogenous	mRNA	39.89	52.03
Gpi1	NM_008155.4	NM_008155.4:1540	Endogenous	mRNA	11837.78	15342.19
Il5	NM_010558.1	NM_010558.1:177	Endogenous	mRNA	31.91	41.32
Amica1	NM_001005421.4	NM_001005421.4:1002	Endogenous	mRNA	56.84	73.45
Cd70	NM_011617.1	NM_011617.1:650	Endogenous	mRNA	43.88	56.62
Ilf3	NM_010561.2	NM_010561.2:1902	Endogenous	mRNA	1821.89	2344.33
Gfi1	NM_010278.2	NM_010278.2:1875	Endogenous	mRNA	36.90	47.44
Tlr9	NM_031178.2	NM_031178.2:1801	Endogenous	mRNA	42.88	55.09
Map2k4	NM_009157.4	NM_009157.4:1335	Endogenous	mRNA	1652.36	2114.79
Ccl8	NM_021443.2	NM_021443.2:150	Endogenous	mRNA	5.98	7.65
Cxcl14	XM_006517307.1	XM_006517307.1:446	Endogenous	mRNA	5.98	7.65
Hamp	NM_032541.1	NM_032541.1:202	Endogenous	mRNA	5.98	7.65
Sele	NM_011345.2	NM_011345.2:2575	Endogenous	mRNA	5.98	7.65
Klra5	NM_008463.2	NM_008463.2:174	Endogenous	mRNA	23.93	30.60
Klra6	NM_008464.2	NM_008464.2:880	Endogenous	mRNA	23.93	30.60
Batf	NM_016767.2	NM_016767.2:750	Endogenous	mRNA	11.97	15.30
CD209e	NM_130905.2	NM_130905.2:696	Endogenous	mRNA	11.97	15.30
Atg10	NM_025770.3	NM_025770.3:46	Endogenous	mRNA	199.44	254.02
H2-Q10	NM_010391.4	NM_010391.4:890	Endogenous	mRNA	45.87	58.15
F13a1	NM_001166391.1	NM_001166391.1:2790	Endogenous	mRNA	16.95	21.42
Map2k2	NM_023138.4	NM_023138.4:1440	Endogenous	mRNA	1822.88	2290.77
Klrd1	NM_010654.2	NM_010654.2:434	Endogenous	mRNA	10.97	13.77
Ctla4	NM_009843.3	NM_009843.3:1475	Endogenous	mRNA	26.92	33.67
Traf6	NM_009424.2	NM_009424.2:980	Endogenous	mRNA	544.47	680.96
Klra7	NM_001110323.1	NM_001110323.1:250	Endogenous	mRNA	15.96	19.89
H2-Q2	NM_010392.2	NM_010392.2:472	Endogenous	mRNA	20.94	26.01
Ifng	NM_008337.1	NM_008337.1:95	Endogenous	mRNA	20.94	26.01
Lrp1	NM_008512.2	NM_008512.2:1310	Endogenous	mRNA	5007.95	6214.31
Aicda	NM_009645.2	NM_009645.2:552	Endogenous	mRNA	25.93	32.14
Il11ra1	NM_010549.3	NM_010549.3:22	Endogenous	mRNA	55.84	68.86
A2m	NM_175628.3	NM_175628.3:2128	Endogenous	mRNA	19.94	24.48
Ccr4	NM_009916.2	NM_009916.2:394	Endogenous	mRNA	9.97	12.24
Cd19	NM_009844.2	NM_009844.2:1118	Endogenous	mRNA	9.97	12.24
Selplg	NM_009151.3	NM_009151.3:1712	Endogenous	mRNA	9.97	12.24
Xcl1	NM_008510.1	NM_008510.1:103	Endogenous	mRNA	9.97	12.24
Zap70	NM_009539.2	NM_009539.2:1030	Endogenous	mRNA	9.97	12.24
Cd40	NM_011611.2	NM_011611.2:1425	Endogenous	mRNA	4.99	6.12
Lyve1	NM_053247.4	NM_053247.4:150	Endogenous	mRNA	4.99	6.12
Cd14	NM_009841.3	NM_009841.3:235	Endogenous	mRNA	161.55	197.40
Cd53	NM_007651.3	NM_007651.3:2300	Endogenous	mRNA	38.89	47.44
Cxcl11	NM_019494.1	NM_019494.1:345	Endogenous	mRNA	33.90	41.32
Smad4	NM_008540.2	NM_008540.2:2885	Endogenous	mRNA	2314.50	2820.23
H2-Aa	NM_010378.2	NM_010378.2:450	Endogenous	mRNA	18.95	22.95
Notch1	NM_008714.2	NM_008714.2:1425	Endogenous	mRNA	216.39	261.67
Ythdf2	NM_145393.4	NM_145393.4:750	Endogenous	mRNA	1537.68	1854.65
Defb1	NM_007843.3	NM_007843.3:157	Endogenous	mRNA	13.96	16.83
Il7	NM_008371.2	NM_008371.2:1055	Endogenous	mRNA	22.94	27.54
Col4a1	NM_009931.2	NM_009931.2:4116	Endogenous	mRNA	718.98	863.06
Il4ra	NM_010557.1	NM_010557.1:3017	Endogenous	mRNA	313.12	374.91
Cxcl3	NM_203320.2	NM_203320.2:275	Endogenous	mRNA	8.97	10.71
Entpd1	NM_009848.3	NM_009848.3:2062	Endogenous	mRNA	8.97	10.71
Ly86	NM_010745.2	NM_010745.2:725	Endogenous	mRNA	8.97	10.71
Ccr8	NM_007720.2	NM_007720.2:426	Endogenous	mRNA	53.85	64.27
Psen1	NM_008943.2	NM_008943.2:2770	Endogenous	mRNA	1038.09	1231.84
Il17rb	NM_019583.3	NM_019583.3:1338	Endogenous	mRNA	21.94	26.01
Cd37	NM_007645.4	NM_007645.4:180	Endogenous	mRNA	12.96	15.30
Ltk	NM_008523.2	NM_008523.2:788	Endogenous	mRNA	25.93	30.60
Ccl11	NM_011330.3	NM_011330.3:430	Endogenous	mRNA	29.92	35.20
Creb1	NM_001037726.1	NM_001037726.1:2734	Endogenous	mRNA	958.31	1126.26
Epcam	NM_008532.2	NM_008532.2:1550	Endogenous	mRNA	63.82	74.98
Atg5	NM_053069.5	NM_053069.5:2142	Endogenous	mRNA	314.12	368.79
Lamp2	NM_001017959.1	NM_001017959.1:908	Endogenous	mRNA	8443.30	9850.16
Cfd	NM_013459.1	NM_013459.1:526	Endogenous	mRNA	24.93	29.07
Il18r1	NM_001161842.1	NM_001161842.1:620	Endogenous	mRNA	28.92	33.67
Fcgr1	NM_010186.5	NM_010186.5:185	Endogenous	mRNA	44.87	52.03
Slc7a11	NM_011990.2	NM_011990.2:1700	Endogenous	mRNA	623.25	720.74
Tirap	NM_001177846.1	NM_001177846.1:254	Endogenous	mRNA	330.07	381.03
Ltf	NM_008522.3	NM_008522.3:2545	Endogenous	mRNA	31.91	36.73
Ptgdr2	NM_009962.2	NM_009962.2:270	Endogenous	mRNA	31.91	36.73
Fcer1g	NM_010185.4	NM_010185.4:264	Endogenous	mRNA	35.90	41.32
Il2rg	NM_013563.3	NM_013563.3:1226	Endogenous	mRNA	19.94	22.95
H2-Ea-ps	NM_010381.2	NM_010381.2:735	Endogenous	mRNA	7.98	9.18
Psmd7	NM_010817.2	NM_010817.2:1424	Endogenous	mRNA	5284.17	6075.06
Masp1	NM_008555.2	NM_008555.2:210	Endogenous	mRNA	1129.83	1296.11
Map3k1	NM_011945.2	NM_011945.2:1640	Endogenous	mRNA	302.15	345.83
Cd44	NM_009851.2	NM_009851.2:112	Endogenous	mRNA	34.90	39.79
Cklf	NM_029295.2	NM_029295.2:54	Endogenous	mRNA	109.69	123.95
Xbp1	NM_013842.2	NM_013842.2:825	Endogenous	mRNA	2960.69	3345.11
Cd1d2	NM_007640.2	NM_007640.2:438	Endogenous	mRNA	33.90	38.26
Ikbkb	NM_010546.2	NM_010546.2:498	Endogenous	mRNA	1534.69	1730.70
Kit	NM_001122733.1	NM_001122733.1:4275	Endogenous	mRNA	14.96	16.83
Syt17	NM_138649.1	NM_138649.1:1390	Endogenous	mRNA	65.82	73.45
Yy1	NM_009537.3	NM_009537.3:760	Endogenous	mRNA	3845.21	4289.26
Itga5	NM_010577.3	NM_010577.3:2446	Endogenous	mRNA	999.20	1114.02
Cspg4	NM_139001.2	NM_139001.2:1530	Endogenous	mRNA	746.90	830.92
Fcgr2b	NM_001077189.1	NM_001077189.1:1225	Endogenous	mRNA	28.92	32.14
Vhl	NM_009507.3	NM_009507.3:820	Endogenous	mRNA	188.47	208.11
Ikbke	NM_019777.3	NM_019777.3:618	Endogenous	mRNA	98.72	108.65
Itgal	NM_008400.2	NM_008400.2:950	Endogenous	mRNA	41.88	45.91
Dmbt1	XM_006507298.1	XM_006507298.1:2054	Endogenous	mRNA	6.98	7.65
Il1rapl2	NM_030688.1	NM_030688.1:202	Endogenous	mRNA	6.98	7.65
Mnx1	NM_019944.1	NM_019944.1:1740	Endogenous	mRNA	6.98	7.65
Mif	NM_010798.2	NM_010798.2:373	Endogenous	mRNA	16503.68	18059.90
Tyk2	NM_001205312.1	NM_001205312.1:1532	Endogenous	mRNA	181.49	197.40
Cd83	NM_009856.2	NM_009856.2:1624	Endogenous	mRNA	23.93	26.01
Chit1	NM_027979.1	NM_027979.1:335	Endogenous	mRNA	23.93	26.01
Klra17	NM_133203.4	NM_133203.4:58	Endogenous	mRNA	23.93	26.01
Cd97	NM_011925.1	NM_011925.1:1975	Endogenous	mRNA	47.87	52.03
Atf2	NM_001284371.1	NM_001284371.1:1392	Endogenous	mRNA	1090.94	1182.88
Atg12	NM_026217.1	NM_026217.1:1800	Endogenous	mRNA	1328.27	1439.96
Abl1	NM_009594.4	NM_009594.4:1378	Endogenous	mRNA	935.37	1011.49
Mapk8	NM_016700.3	NM_016700.3:970	Endogenous	mRNA	755.88	815.62
Cebpb	NM_009883.3	NM_009883.3:1147	Endogenous	mRNA	4907.23	5286.98
Cdh5	NM_009868.3	NM_009868.3:1615	Endogenous	mRNA	9.97	10.71
Irf4	NM_013674.1	NM_013674.1:1878	Endogenous	mRNA	9.97	10.71
Klra1	NM_016659.3	NM_016659.3:105	Endogenous	mRNA	9.97	10.71
S100b	NM_009115.3	NM_009115.3:1090	Endogenous	mRNA	9.97	10.71
Saa1	NM_009117.3	NM_009117.3:351	Endogenous	mRNA	9.97	10.71
Tek	NM_013690.2	NM_013690.2:3580	Endogenous	mRNA	9.97	10.71
Ms4a1	NM_007641.5	NM_007641.5:166	Endogenous	mRNA	29.92	32.14
Ewsr1	NM_007968.3	NM_007968.3:150	Endogenous	mRNA	5782.77	6197.47
Cd3g	NM_009850.2	NM_009850.2:430	Endogenous	mRNA	12.96	13.77
Cxcl16	NM_023158.6	NM_023158.6:679	Endogenous	mRNA	12.96	13.77
Ikbkg	NM_178590.2	NM_178590.2:525	Endogenous	mRNA	409.85	434.59
Ccl21a	NM_011124.4	NM_011124.4:170	Endogenous	mRNA	31.91	33.67
Gzma	NM_010370.2	NM_010370.2:188	Endogenous	mRNA	31.91	33.67
C5ar1	NM_007577.3	NM_007577.3:595	Endogenous	mRNA	47.87	50.50
Colec12	NM_130449.2	NM_130449.2:736	Endogenous	mRNA	2500.98	2636.60
Cx3cr1	NM_009987.3	NM_009987.3:2696	Endogenous	mRNA	221.38	232.60
Ubc	NM_019639.4	NM_019639.4:2193	Endogenous	mRNA	20571.27	21603.94
Sh2d1b1	NM_012009.4	NM_012009.4:973	Endogenous	mRNA	27.92	29.07
Ticam1	NM_174989.4	NM_174989.4:2159	Endogenous	mRNA	172.52	179.04
Jak1	NM_146145.2	NM_146145.2:4080	Endogenous	mRNA	3158.14	3247.17
Cd276	NM_133983.4	NM_133983.4:1278	Endogenous	mRNA	1344.23	1378.75
Tmem173	NM_028261.1	NM_028261.1:1792	Endogenous	mRNA	282.21	289.22
Ccr3	NM_009914.4	NM_009914.4:664	Endogenous	mRNA	2.99	3.06
Il12rb2	NM_008354.3	NM_008354.3:1395	Endogenous	mRNA	8.97	9.18
Il5ra	NM_008370.2	NM_008370.2:2290	Endogenous	mRNA	5.98	6.12
Itgam	NM_008401.2	NM_008401.2:155	Endogenous	mRNA	8.97	9.18
Pmch	NM_029971.2	NM_029971.2:215	Endogenous	mRNA	8.97	9.18
Cfp	NM_008823.3	NM_008823.3:1107	Endogenous	mRNA	53.85	55.09
Cmklr1	NM_008153.3	NM_008153.3:445	Endogenous	mRNA	14.96	15.30
Cd200r1	NM_021325.3	NM_021325.3:1090	Endogenous	mRNA	11.97	12.24
Tnfrsf13c	NM_028075.2	NM_028075.2:1170	Endogenous	mRNA	11.97	12.24
Ifitm2	NM_030694.1	NM_030694.1:87	Endogenous	mRNA	8611.83	8704.01
Tfe3	NM_172472.3	NM_172472.3:2715	Endogenous	mRNA	501.59	503.45
Ppbp	NM_023785.2	NM_023785.2:225	Endogenous	mRNA	51.85	52.03
Cd63	NM_001042580.1	NM_001042580.1:220	Endogenous	mRNA	37604.46	37731.14
Mapkapk2	NM_008551.1	NM_008551.1:1991	Endogenous	mRNA	1118.86	1110.95
Cd164	NM_016898.2	NM_016898.2:688	Endogenous	mRNA	7536.85	7459.92
Tnfrsf1a	NM_011609.2	NM_011609.2:615	Endogenous	mRNA	1963.49	1937.28
Mrc1	NM_008625.1	NM_008625.1:3992	Endogenous	mRNA	13.96	13.77
Pdcd1lg2	NM_021396.2	NM_021396.2:1870	Endogenous	mRNA	27.92	27.54
Trem1	NM_021406.5	NM_021406.5:1704	Endogenous	mRNA	27.92	27.54
Fos	NM_010234.2	NM_010234.2:1330	Endogenous	mRNA	133.62	131.60
Ifnar1	NM_010508.1	NM_010508.1:1195	Endogenous	mRNA	1837.84	1808.74
Cd28	NM_007642.4	NM_007642.4:3304	Endogenous	mRNA	77.78	76.51
Cma1	NM_010780.2	NM_010780.2:860	Endogenous	mRNA	10.97	10.71
Ltb	NM_008518.2	NM_008518.2:163	Endogenous	mRNA	10.97	10.71
Msr1	NM_001113326.1	NM_001113326.1:555	Endogenous	mRNA	10.97	10.71
Tnfrsf17	NM_011608.1	NM_011608.1:140	Endogenous	mRNA	10.97	10.71
Irak2	NM_001113553.1	NM_001113553.1:485	Endogenous	mRNA	103.71	101.00
S100a8	NM_013650.2	NM_013650.2:227	Endogenous	mRNA	29.92	29.07
Arg2	NM_009705.2	NM_009705.2:249	Endogenous	mRNA	18.95	18.36
Jak2	NM_008413.2	NM_008413.2:1049	Endogenous	mRNA	1249.49	1208.89
Vcam1	NM_011693.2	NM_011693.2:1440	Endogenous	mRNA	174.51	168.33
Hspb2	NM_024441.3	NM_024441.3:667	Endogenous	mRNA	55.84	53.56
Clec4a2	NM_001170332.1	NM_001170332.1:923	Endogenous	mRNA	7.98	7.65
Ctsg	NM_007800.1	NM_007800.1:785	Endogenous	mRNA	7.98	7.65
Ptprc	NM_011210.3	NM_011210.3:2320	Endogenous	mRNA	7.98	7.65
Pdgfc	NM_019971.2	NM_019971.2:1165	Endogenous	mRNA	877.54	838.57
Mavs	NM_144888.1	NM_144888.1:2510	Endogenous	mRNA	963.30	915.08
App	NM_007471.2	NM_007471.2:511	Endogenous	mRNA	7708.37	7314.55
Nfkbia	NM_010907.2	NM_010907.2:646	Endogenous	mRNA	485.64	459.07
Cd4	NM_013488.2	NM_013488.2:950	Endogenous	mRNA	12.96	12.24
Marco	NM_010766.2	NM_010766.2:350	Endogenous	mRNA	12.96	12.24
Ncr1	NM_010746.3	NM_010746.3:391	Endogenous	mRNA	12.96	12.24
Klrc1	NM_001136068.1	NM_001136068.1:68	Endogenous	mRNA	25.93	24.48
H60a	NM_010400.2	NM_010400.2:2020	Endogenous	mRNA	576.38	543.24
Tbk1	NM_019786.4	NM_019786.4:440	Endogenous	mRNA	494.61	465.19
Ifitm1	NM_001112715.1	NM_001112715.1:412	Endogenous	mRNA	79.78	74.98
Csf3	NM_009971.1	NM_009971.1:830	Endogenous	mRNA	35.90	33.67
C8g	NM_027062.1	NM_027062.1:770	Endogenous	mRNA	17.95	16.83
Tgfbr2	NM_009371.2	NM_009371.2:475	Endogenous	mRNA	1416.03	1320.60
Stat6	NM_009284.2	NM_009284.2:3465	Endogenous	mRNA	3139.19	2924.29
Anp32b	NM_130889.2	NM_130889.2:480	Endogenous	mRNA	27662.37	25766.19
Irf2	NM_008391.2	NM_008391.2:440	Endogenous	mRNA	1138.80	1058.93
C3ar1	NM_009779.2	NM_009779.2:555	Endogenous	mRNA	9.97	9.18
Ceacam1	NM_001039185.1	NM_001039185.1:294	Endogenous	mRNA	19.94	18.36
Xcr1	NM_011798.4	NM_011798.4:350	Endogenous	mRNA	29.92	27.54
Cxcr5	NM_007551.2	NM_007551.2:1648	Endogenous	mRNA	4.99	4.59
Fcgr3	NM_010188.5	NM_010188.5:1175	Endogenous	mRNA	4.99	4.59
Ticam2	NM_173394.2	NM_173394.2:1243	Endogenous	mRNA	4.99	4.59
Usp9y	NM_148943.2	NM_148943.2:480	Endogenous	mRNA	4.99	4.59
Hif1a	NM_010431.2	NM_010431.2:1294	Endogenous	mRNA	7663.49	7011.56
Cdk1	NM_007659.3	NM_007659.3:2538	Endogenous	mRNA	31.91	29.07
Psmb8	NM_010724.2	NM_010724.2:362	Endogenous	mRNA	31.91	29.07
Btk	NM_013482.2	NM_013482.2:2255	Endogenous	mRNA	26.92	24.48
Cdh1	NM_009864.2	NM_009864.2:1610	Endogenous	mRNA	38.89	35.20
C1ra	NM_023143.3	NM_023143.3:1923	Endogenous	mRNA	1174.70	1061.99
Tgfbr1	NM_009370.2	NM_009370.2:4425	Endogenous	mRNA	1680.28	1516.47
Cd48	NM_007649.4	NM_007649.4:370	Endogenous	mRNA	11.97	10.71
Havcr2	NM_134250.2	NM_134250.2:134	Endogenous	mRNA	11.97	10.71
Il17f	NM_145856.2	NM_145856.2:625	Endogenous	mRNA	11.97	10.71
Klrg1	NM_016970.1	NM_016970.1:825	Endogenous	mRNA	11.97	10.71
Cd59b	NM_181858.1	NM_181858.1:322	Endogenous	mRNA	42.88	38.26
Cxcr2	NM_009909.3	NM_009909.3:440	Endogenous	mRNA	30.91	27.54
Ccnd3	NM_007632.2	NM_007632.2:1311	Endogenous	mRNA	316.11	280.03
Klra20	NM_053150.2	NM_053150.2:176	Endogenous	mRNA	32.91	29.07
Fyn	NM_008054.2	NM_008054.2:1030	Endogenous	mRNA	2295.56	2024.51
Erbb2	NM_001003817.1	NM_001003817.1:1395	Endogenous	mRNA	714.99	627.40
Il1b	NM_008361.3	NM_008361.3:1120	Endogenous	mRNA	6.98	6.12
Nefl	NM_010910.1	NM_010910.1:1303	Endogenous	mRNA	13.96	12.24
Pecam1	NM_008816.2	NM_008816.2:1100	Endogenous	mRNA	13.96	12.24
Tnfsf13	NM_023517.2	NM_023517.2:1443	Endogenous	mRNA	13.96	12.24
Pml	NM_008884.5	NM_008884.5:616	Endogenous	mRNA	1428.99	1248.68
Nod2	NM_145857.2	NM_145857.2:1086	Endogenous	mRNA	43.88	38.26
Cxcr3	NM_009910.2	NM_009910.2:605	Endogenous	mRNA	36.90	32.14
Il16	NM_010551.3	NM_010551.3:3095	Endogenous	mRNA	31.91	27.54
Bmi1	NM_007552.4	NM_007552.4:3354	Endogenous	mRNA	887.51	763.59
C1s1	NM_144938.2	NM_144938.2:2490	Endogenous	mRNA	1241.52	1066.58
Chil3	NM_009892.2	NM_009892.2:823	Endogenous	mRNA	33.90	29.07
Cxcl2	NM_009140.2	NM_009140.2:765	Endogenous	mRNA	8.97	7.65
F12	NM_021489.2	NM_021489.2:405	Endogenous	mRNA	8.97	7.65
H2-Q1	NM_010390.3	NM_010390.3:316	Endogenous	mRNA	8.97	7.65
Mpped1	NM_172610.3	NM_172610.3:424	Endogenous	mRNA	8.97	7.65
Ifna1	NM_010502.2	NM_010502.2:30	Endogenous	mRNA	26.92	22.95
Tlr8	NM_133212.2	NM_133212.2:110	Endogenous	mRNA	26.92	22.95
Map2k1	NM_008927.3	NM_008927.3:1695	Endogenous	mRNA	2522.92	2143.87
Ets1	NM_001038642.1	NM_001038642.1:740	Endogenous	mRNA	2523.92	2134.69
Atf1	NM_007497.3	NM_007497.3:1216	Endogenous	mRNA	714.99	604.45
Atm	NM_007499.2	NM_007499.2:5543	Endogenous	mRNA	657.16	552.42
Pla2g6	NM_001199023.1	NM_001199023.1:768	Endogenous	mRNA	647.18	543.24
Ifna4	NM_010504.2	NM_010504.2:261	Endogenous	mRNA	21.94	18.36
Psmb7	NM_011187.1	NM_011187.1:184	Endogenous	mRNA	6601.47	5521.11
Tlr4	NM_021297.2	NM_021297.2:2510	Endogenous	mRNA	2233.73	1862.30
Smpd3	NM_021491.3	NM_021491.3:1578	Endogenous	mRNA	47.87	39.79
C6	NM_016704.2	NM_016704.2:170	Endogenous	mRNA	12.96	10.71
Hmgb1	NM_010439.3	NM_010439.3:1574	Endogenous	mRNA	3436.36	2827.88
Osm	NM_001013365.2	NM_001013365.2:579	Endogenous	mRNA	27.92	22.95
Nod1	NM_172729.2	NM_172729.2:1446	Endogenous	mRNA	85.76	70.39
Stat5b	NM_011489.3	NM_011489.3:4855	Endogenous	mRNA	705.02	573.84
Tnfsf14	NM_019418.2	NM_019418.2:1060	Endogenous	mRNA	33.90	27.54
Fadd	NM_010175.5	NM_010175.5:2641	Endogenous	mRNA	109.69	88.75
Tgfb3	NM_009368.2	NM_009368.2:2410	Endogenous	mRNA	1191.66	964.05
Crp	NM_007768.4	NM_007768.4:163	Endogenous	mRNA	18.95	15.30
Raet1	NM_009018.1	NM_009018.1:548	Endogenous	mRNA	18.95	15.30
Tank	NM_011529.1	NM_011529.1:491	Endogenous	mRNA	920.42	742.17
Smad3	NM_016769.3	NM_016769.3:1845	Endogenous	mRNA	2007.37	1615.93
Abcb1a	NM_011076.1	NM_011076.1:2600	Endogenous	mRNA	207.42	166.80
Irak1	NM_008363.2	NM_008363.2:951	Endogenous	mRNA	1399.07	1123.20
Angpt2	NM_007426.3	NM_007426.3:2020	Endogenous	mRNA	243.32	194.34
Itch	NM_008395.2	NM_008395.2:575	Endogenous	mRNA	2897.87	2313.72
Ccrl2	NM_017466.4	NM_017466.4:655	Endogenous	mRNA	24.93	19.89
Ep300	NM_177821.6	NM_177821.6:4305	Endogenous	mRNA	1316.31	1045.15
Prkce	NM_011104.2	NM_011104.2:1510	Endogenous	mRNA	391.90	309.11
Sh2b2	NM_018825.3	NM_018825.3:1074	Endogenous	mRNA	208.42	163.74
Mfge8	NM_008594.2	NM_008594.2:1357	Endogenous	mRNA	1450.93	1121.67
Ccl24	NM_019577.4	NM_019577.4:335	Endogenous	mRNA	9.97	7.65
Ebi3	NM_015766.2	NM_015766.2:1015	Endogenous	mRNA	9.97	7.65
Tnfsf15	NM_177371.3	NM_177371.3:4695	Endogenous	mRNA	9.97	7.65
Slc11a1	NM_013612.2	NM_013612.2:945	Endogenous	mRNA	13.96	10.71
Cfi	NM_007686.2	NM_007686.2:421	Endogenous	mRNA	25.93	19.89
Cd207	NM_144943.3	NM_144943.3:605	Endogenous	mRNA	15.96	12.24
Cxcl12	NM_021704.3	NM_021704.3:259	Endogenous	mRNA	11.97	9.18
Cxcr1	NM_178241.4	NM_178241.4:860	Endogenous	mRNA	3.99	3.06
Prf1	NM_011073.2	NM_011073.2:1350	Endogenous	mRNA	3.99	3.06
Csf1	NM_001113530.1	NM_001113530.1:833	Endogenous	mRNA	13308.65	10176.10
Relb	NM_009046.2	NM_009046.2:2013	Endogenous	mRNA	840.64	642.70
Nfatc3	NM_010901.2	NM_010901.2:2260	Endogenous	mRNA	722.97	547.83
Lamp1	NM_010684.2	NM_010684.2:2080	Endogenous	mRNA	16790.88	12626.02
Il18	NM_008360.1	NM_008360.1:270	Endogenous	mRNA	89.75	67.33
Map3k7	NM_009316.1	NM_009316.1:822	Endogenous	mRNA	1704.22	1277.75
Ccr7	NM_007719.2	NM_007719.2:755	Endogenous	mRNA	34.90	26.01
Nfkb2	NM_019408.2	NM_019408.2:1150	Endogenous	mRNA	2467.08	1834.76
Cd40lg	NM_011616.2	NM_011616.2:600	Endogenous	mRNA	28.92	21.42
Il12a	NM_008351.1	NM_008351.1:355	Endogenous	mRNA	28.92	21.42
Nfkb1	NM_008689.2	NM_008689.2:2125	Endogenous	mRNA	2319.49	1716.93
H2-M3	NM_013819.2	NM_013819.2:1180	Endogenous	mRNA	496.61	365.73
Lyn	NM_010747.1	NM_010747.1:1725	Endogenous	mRNA	363.98	264.73
Prkcd	NM_011103.2	NM_011103.2:1265	Endogenous	mRNA	1769.04	1277.75
Ncf4	NM_008677.2	NM_008677.2:741	Endogenous	mRNA	50.86	36.73
Cd244	NM_018729.2	NM_018729.2:262	Endogenous	mRNA	33.90	24.48
Tfrc	NM_011638.3	NM_011638.3:1930	Endogenous	mRNA	1990.41	1436.90
Cd47	NM_010581.3	NM_010581.3:165	Endogenous	mRNA	2904.85	2026.04
Cd96	NM_032465.2	NM_032465.2:34	Endogenous	mRNA	10.97	7.65
Foxp3	NM_054039.2	NM_054039.2:194	Endogenous	mRNA	10.97	7.65
Mapk14	NM_001168513.1	NM_001168513.1:114	Endogenous	mRNA	2011.35	1394.05
Tpsab1	NM_031187.4	NM_031187.4:663	Endogenous	mRNA	46.87	32.14
Flt3l	NM_013520.2	NM_013520.2:529	Endogenous	mRNA	290.19	198.93
Bcl10	NM_009740.1	NM_009740.1:1168	Endogenous	mRNA	2206.81	1510.35
Casp1	NM_009807.2	NM_009807.2:259	Endogenous	mRNA	2183.87	1493.51
Il10	NM_010548.1	NM_010548.1:985	Endogenous	mRNA	8.97	6.12
Il9	NM_008373.1	NM_008373.1:39	Endogenous	mRNA	8.97	6.12
Tdo2	NM_019911.2	NM_019911.2:495	Endogenous	mRNA	8.97	6.12
Casp8	NM_009812.2	NM_009812.2:1463	Endogenous	mRNA	907.45	616.69
Tnfsf18	NM_183391.3	NM_183391.3:1445	Endogenous	mRNA	67.81	45.91
Klrb1c	NM_008527.2	NM_008527.2:47	Endogenous	mRNA	15.96	10.71
Slamf7	NM_144539.5	NM_144539.5:750	Endogenous	mRNA	15.96	10.71
Tlr7	NM_133211.3	NM_133211.3:3210	Endogenous	mRNA	15.96	10.71
Cyfip2	NM_001252459.1	NM_001252459.1:1136	Endogenous	mRNA	243.32	162.21
Myd88	NM_010851.2	NM_010851.2:1595	Endogenous	mRNA	717.98	475.90
Csf3r	NM_001252651.1	NM_001252651.1:1294	Endogenous	mRNA	6.98	4.59
Il27	NM_145636.1	NM_145636.1:402	Endogenous	mRNA	13.96	9.18
Nlrp3	NM_145827.3	NM_145827.3:508	Endogenous	mRNA	6.98	4.59
Timd4	NM_178759.4	NM_178759.4:236	Endogenous	mRNA	6.98	4.59
Bid	NM_007544.3	NM_007544.3:1307	Endogenous	mRNA	1577.57	1034.44
Traf3	NM_001048206.1	NM_001048206.1:6385	Endogenous	mRNA	550.46	359.61
Klrb1	NM_001099918.1	NM_001099918.1:327	Endogenous	mRNA	32.91	21.42
Ccl1	NM_011329.2	NM_011329.2:145	Endogenous	mRNA	18.95	12.24
Ifi35	NM_027320.4	NM_027320.4:820	Endogenous	mRNA	1263.45	812.56
Dpp4	NM_001159543.1	NM_001159543.1:1303	Endogenous	mRNA	11.97	7.65
Il22	NM_016971.1	NM_016971.1:477	Endogenous	mRNA	16.95	10.71
Ripk2	NM_138952.3	NM_138952.3:830	Endogenous	mRNA	514.56	319.82
Ifi27	NM_026790.2	NM_026790.2:166	Endogenous	mRNA	3270.82	2015.33
Tmed1	NM_010744.3	NM_010744.3:104	Endogenous	mRNA	1075.98	662.59
Cd6	NM_001037801.2	NM_001037801.2:1315	Endogenous	mRNA	9.97	6.12
Il15ra	NM_008358.2	NM_008358.2:800	Endogenous	mRNA	102.71	62.74
Irak4	NM_029926.5	NM_029926.5:250	Endogenous	mRNA	700.04	426.94
Stat3	NM_213659.2	NM_213659.2:2130	Endogenous	mRNA	2635.60	1606.75
Mr1	NM_008209.4	NM_008209.4:1360	Endogenous	mRNA	120.66	73.45
Sbno2	NM_183426.1	NM_183426.1:2656	Endogenous	mRNA	489.63	296.87
Pdgfrb	NM_008809.1	NM_008809.1:1185	Endogenous	mRNA	165.54	99.47
Traf2	NM_009422.2	NM_009422.2:1334	Endogenous	mRNA	1351.21	809.50
Plau	NM_008873.2	NM_008873.2:1950	Endogenous	mRNA	1604.50	959.46
Bcl2	NM_009741.3	NM_009741.3:1844	Endogenous	mRNA	161.55	96.41
Blnk	NM_008528.4	NM_008528.4:1546	Endogenous	mRNA	782.80	462.13
Gpr183	NM_183031.2	NM_183031.2:238	Endogenous	mRNA	12.96	7.65
Snai1	NM_011427.2	NM_011427.2:910	Endogenous	mRNA	98.72	58.15
Nup107	NM_134010.2	NM_134010.2:200	Endogenous	mRNA	2262.65	1329.78
Casp3	NM_009810.2	NM_009810.2:630	Endogenous	mRNA	3873.13	2270.88
Ccr9	NM_009913.6	NM_009913.6:820	Endogenous	mRNA	15.96	9.18
Cxcr6	NM_030712.4	NM_030712.4:650	Endogenous	mRNA	7.98	4.59
Gzmk	NM_008196.1	NM_008196.1:302	Endogenous	mRNA	7.98	4.59
Tnfsf4	NM_009452.2	NM_009452.2:346	Endogenous	mRNA	7.98	4.59
Nt5e	NM_011851.3	NM_011851.3:1600	Endogenous	mRNA	1239.52	703.91
Ifngr1	NM_010511.2	NM_010511.2:985	Endogenous	mRNA	1378.13	781.95
Pnma1	NM_027438.3	NM_027438.3:906	Endogenous	mRNA	18.95	10.71
Tab1	NM_025609.2	NM_025609.2:570	Endogenous	mRNA	1421.01	795.73
Tnfrsf1b	NM_011610.3	NM_011610.3:3270	Endogenous	mRNA	823.69	457.54
C9	NM_013485.1	NM_013485.1:226	Endogenous	mRNA	38.89	21.42
Tnfrsf9	NM_001077508.1	NM_001077508.1:1590	Endogenous	mRNA	41.88	22.95
Tnfsf10	NM_009425.2	NM_009425.2:2055	Endogenous	mRNA	13.96	7.65
Isg20	NM_020583.5	NM_020583.5:552	Endogenous	mRNA	1627.43	886.01
Tfeb	NM_001161723.1	NM_001161723.1:534	Endogenous	mRNA	115.68	62.74
Ifnar2	NM_001110498.1	NM_001110498.1:725	Endogenous	mRNA	1401.07	748.29
Clu	NM_013492.2	NM_013492.2:354	Endogenous	mRNA	946.34	497.33
Bst2	NM_198095.2	NM_198095.2:468	Endogenous	mRNA	1652.36	864.59
H2-Dma	NM_010386.3	NM_010386.3:530	Endogenous	mRNA	93.74	48.97
Ccl25	NM_009138.3	NM_009138.3:316	Endogenous	mRNA	146.59	76.51
Cx3cl1	NM_009142.3	NM_009142.3:125	Endogenous	mRNA	310.13	160.68
C7	XM_356827.6	XM_356827.6:215	Endogenous	mRNA	2.99	1.53
Camp	NM_009921.2	NM_009921.2:355	Endogenous	mRNA	2.99	1.53
Fut7	NM_001177367.1	NM_001177367.1:1151	Endogenous	mRNA	8.97	4.59
Il21	NM_021782.2	NM_021782.2:1762	Endogenous	mRNA	2.99	1.53
Lamp3	NM_177356.3	NM_177356.3:1074	Endogenous	mRNA	8.97	4.59
Oas3	NM_145226.2	NM_145226.2:365	Endogenous	mRNA	65.82	33.67
Ccr2	NM_009915.2	NM_009915.2:2965	Endogenous	mRNA	17.95	9.18
Txk	NM_001122754.1	NM_001122754.1:835	Endogenous	mRNA	17.95	9.18
Cd36	NM_007643.3	NM_007643.3:1520	Endogenous	mRNA	32.91	16.83
Icos	NM_017480.1	NM_017480.1:142	Endogenous	mRNA	14.96	7.65
Cyld	NM_001276279.1	NM_001276279.1:2200	Endogenous	mRNA	1654.36	826.33
C4b	NM_009780.2	NM_009780.2:491	Endogenous	mRNA	27.92	13.77
Birc5	NM_009689.2	NM_009689.2:237	Endogenous	mRNA	814.71	397.86
Cd55	NM_010016.2	NM_010016.2:1058	Endogenous	mRNA	18.95	9.18
Map4k2	NM_009006.2	NM_009006.2:666	Endogenous	mRNA	153.57	73.45
Mapk11	NM_011161.5	NM_011161.5:396	Endogenous	mRNA	207.42	97.94
Tnfrsf14	NM_178931.2	NM_178931.2:625	Endogenous	mRNA	97.73	45.91
Socs3	NM_007707.2	NM_007707.2:585	Endogenous	mRNA	112.68	52.03
Itga4	NM_010576.3	NM_010576.3:6600	Endogenous	mRNA	9.97	4.59
Gbp2b	NM_010259.2	NM_010259.2:1808	Endogenous	mRNA	39.89	18.36
Ccl7	NM_013654.2	NM_013654.2:215	Endogenous	mRNA	222.38	101.00
Muc1	NM_013605.1	NM_013605.1:1445	Endogenous	mRNA	64.82	29.07
Fas	NM_007987.2	NM_007987.2:596	Endogenous	mRNA	147.59	65.80
Ulbp1	NM_029975.2	NM_029975.2:595	Endogenous	mRNA	30.91	13.77
Tlr6	NM_011604.3	NM_011604.3:475	Endogenous	mRNA	170.52	73.45
Irf8	NM_008320.3	NM_008320.3:2274	Endogenous	mRNA	24.93	10.71
Fpr2	NM_008039.2	NM_008039.2:1015	Endogenous	mRNA	10.97	4.59
Il25	NM_080729.2	NM_080729.2:649	Endogenous	mRNA	10.97	4.59
Oas2	NM_145227.3	NM_145227.3:414	Endogenous	mRNA	146.59	61.21
Spn	NM_001037810.1	NM_001037810.1:726	Endogenous	mRNA	413.84	166.80
Tnfsf12	NM_011614.3	NM_011614.3:1215	Endogenous	mRNA	122.66	48.97
Tgfb2	NM_009367.1	NM_009367.1:1685	Endogenous	mRNA	426.80	166.80
Ifit2	NM_008332.2	NM_008332.2:230	Endogenous	mRNA	1681.28	654.94
Nrp1	NM_008737.2	NM_008737.2:1190	Endogenous	mRNA	939.36	362.67
Angpt1	NM_009640.3	NM_009640.3:1350	Endogenous	mRNA	230.35	88.75
Ccl3	NM_011337.1	NM_011337.1:60	Endogenous	mRNA	27.92	10.71
Maf	NM_001025577.2	NM_001025577.2:43	Endogenous	mRNA	55.84	21.42
Emr1	NM_010130.1	NM_010130.1:995	Endogenous	mRNA	3.99	1.53
Pla2g1b	NM_011107.1	NM_011107.1:360	Endogenous	mRNA	7.98	3.06
Tap1	NM_001161730.1	NM_001161730.1:856	Endogenous	mRNA	432.79	163.74
Fcgr4	NM_144559.1	NM_144559.1:608	Endogenous	mRNA	40.89	15.30
Ifit3	NM_010501.1	NM_010501.1:1290	Endogenous	mRNA	775.82	284.62
Tap2	NM_011530.2	NM_011530.2:495	Endogenous	mRNA	359.99	131.60
Lta	NM_010735.1	NM_010735.1:1115	Endogenous	mRNA	42.88	15.30
Jak3	NM_010589.5	NM_010589.5:145	Endogenous	mRNA	196.45	67.33
Cd69	NM_001033122.3	NM_001033122.3:1370	Endogenous	mRNA	8.97	3.06
Ctsw	NM_009985.4	NM_009985.4:190	Endogenous	mRNA	13.96	4.59
Usp18	NM_011909.2	NM_011909.2:1190	Endogenous	mRNA	136.62	42.85
Gata3	NM_008091.3	NM_008091.3:1943	Endogenous	mRNA	254.29	79.57
Psmb9	NM_013585.2	NM_013585.2:540	Endogenous	mRNA	167.53	52.03
Cxcl13	NM_018866.2	NM_018866.2:551	Endogenous	mRNA	9.97	3.06
Il4	NM_021283.1	NM_021283.1:345	Endogenous	mRNA	9.97	3.06
Ccl20	NM_016960.1	NM_016960.1:120	Endogenous	mRNA	69.80	21.42
Itk	NM_010583.3	NM_010583.3:404	Endogenous	mRNA	14.96	4.59
Tgfb1	NM_011577.1	NM_011577.1:1470	Endogenous	mRNA	1849.81	564.66
Psmb10	NM_013640.3	NM_013640.3:401	Endogenous	mRNA	277.22	84.16
Rel	NM_009044.2	NM_009044.2:1290	Endogenous	mRNA	365.97	110.18
Mef2c	NM_001170537.1	NM_001170537.1:4341	Endogenous	mRNA	498.60	149.96
Bst1	NM_009763.3	NM_009763.3:854	Endogenous	mRNA	40.89	12.24
Ifit1	NM_008331.2	NM_008331.2:890	Endogenous	mRNA	1034.10	307.58
Stat1	NM_009283.3	NM_009283.3:1590	Endogenous	mRNA	702.03	206.58
Cxcl1	NM_008176.1	NM_008176.1:560	Endogenous	mRNA	499.60	145.37
Irf7	NM_016850.2	NM_016850.2:705	Endogenous	mRNA	247.31	71.92
Ccl17	NM_011332.2	NM_011332.2:247	Endogenous	mRNA	182.49	52.03
Cxcl5	NM_009141.2	NM_009141.2:565	Endogenous	mRNA	614.28	171.39
Lyz2	NM_017372.3	NM_017372.3:98	Endogenous	mRNA	10.97	3.06
Il1r1	NM_001123382.1	NM_001123382.1:820	Endogenous	mRNA	907.45	249.43
Il2rb	NM_008368.3	NM_008368.3:2365	Endogenous	mRNA	39.89	10.71
H2-D1	NM_010380.3	NM_010380.3:1133	Endogenous	mRNA	16369.06	4394.85
Ccl9	NM_011338.2	NM_011338.2:1125	Endogenous	mRNA	747.90	198.93
Stat2	NM_019963.1	NM_019963.1:362	Endogenous	mRNA	789.78	209.64
Cd7	NM_009854.1	NM_009854.1:234	Endogenous	mRNA	5.98	1.53
Clec5a	NM_001038604.1	NM_001038604.1:605	Endogenous	mRNA	5.98	1.53
Lcn2	NM_008491.1	NM_008491.1:190	Endogenous	mRNA	42.88	10.71
Irgm2	NM_019440.2	NM_019440.2:2555	Endogenous	mRNA	191.46	45.91
Tlr5	NM_016928.2	NM_016928.2:560	Endogenous	mRNA	12.96	3.06
Cd74	NM_001042605.1	NM_001042605.1:391	Endogenous	mRNA	33.90	7.65
Ccl5	NM_013653.3	NM_013653.3:240	Endogenous	mRNA	318.11	70.39
Mmp9	NM_013599.2	NM_013599.2:1570	Endogenous	mRNA	27.92	6.12
Tlr3	NM_126166.2	NM_126166.2:1165	Endogenous	mRNA	111.69	24.48
Tapbp	NM_009318.2	NM_009318.2:2195	Endogenous	mRNA	1611.48	350.43
Pik3cd	XM_003945690.1	XM_003945690.1:4648	Endogenous	mRNA	127.64	27.54
Gbp5	NM_153564.2	NM_153564.2:1176	Endogenous	mRNA	42.88	9.18
Ccl2	NM_011333.3	NM_011333.3:415	Endogenous	mRNA	5644.16	1204.30
Vegfc	NM_009506.2	NM_009506.2:1320	Endogenous	mRNA	1433.98	283.09
Irf1	NM_008390.1	NM_008390.1:365	Endogenous	mRNA	2781.19	546.30
Nfatc4	NM_023699.3	NM_023699.3:2205	Endogenous	mRNA	119.66	22.95
Xaf1	NM_001037713.3	NM_001037713.3:100	Endogenous	mRNA	697.04	130.07
Rsad2	NM_021384.4	NM_021384.4:510	Endogenous	mRNA	346.03	64.27
Cd1d1	NM_007639.3	NM_007639.3:1340	Endogenous	mRNA	595.33	108.65
Itga1	NM_001033228.3	NM_001033228.3:2550	Endogenous	mRNA	189.47	33.67
Mcam	NM_023061.2	NM_023061.2:630	Endogenous	mRNA	172.52	30.60
Ddx58	NM_172689.3	NM_172689.3:1751	Endogenous	mRNA	3706.60	638.11
Sell	NM_001164059.1	NM_001164059.1:664	Endogenous	mRNA	8.97	1.53
Zbp1	NM_021394.2	NM_021394.2:473	Endogenous	mRNA	238.33	39.79
Hc	NM_010406.1	NM_010406.1:1065	Endogenous	mRNA	36.90	6.12
Ifi44	NM_133871.2	NM_133871.2:990	Endogenous	mRNA	1093.93	177.51
Ada	NM_007398.3	NM_007398.3:795	Endogenous	mRNA	372.95	58.15
Il12rb1	NM_008353.2	NM_008353.2:1088	Endogenous	mRNA	59.83	9.18
Tcf7	NM_009331.3	NM_009331.3:1810	Endogenous	mRNA	372.95	55.09
Runx3	NM_019732.2	NM_019732.2:803	Endogenous	mRNA	107.70	15.30
Herc6	NM_025992.2	NM_025992.2:876	Endogenous	mRNA	837.65	105.59
Mx2	NM_013606.1	NM_013606.1:2095	Endogenous	mRNA	150.58	18.36
Sh2d1a	NM_011364.3	NM_011364.3:250	Endogenous	mRNA	12.96	1.53
Lck	NM_010693.2	NM_010693.2:1180	Endogenous	mRNA	92.74	10.71
Klrc2	NM_010653.4	NM_010653.4:259	Endogenous	mRNA	13.96	1.53
Ddx60	NM_001081215.1	NM_001081215.1:2965	Endogenous	mRNA	212.40	22.95
Cmpk2	NM_020557.4	NM_020557.4:1600	Endogenous	mRNA	466.69	48.97
Lbp	NM_008489.2	NM_008489.2:1015	Endogenous	mRNA	307.14	32.14
C3	NM_009778.2	NM_009778.2:285	Endogenous	mRNA	174.51	16.83
Ncam1	NM_001113204.1	NM_001113204.1:740	Endogenous	mRNA	797.76	76.51
Irf5	NM_012057.3	NM_012057.3:1826	Endogenous	mRNA	411.84	35.20
Cxcl10	NM_021274.1	NM_021274.1:115	Endogenous	mRNA	1051.05	87.22
Tlr2	NM_011905.2	NM_011905.2:255	Endogenous	mRNA	339.05	27.54
Nlrc5	NM_001033207.3	NM_001033207.3:6665	Endogenous	mRNA	137.61	10.71
Cfh	NM_009888.3	NM_009888.3:807	Endogenous	mRNA	1274.42	96.41
Rrad	NM_019662.2	NM_019662.2:1439	Endogenous	mRNA	634.22	32.14
H2-K1	NM_001001892.2	NM_001001892.2:1370	Endogenous	mRNA	6810.89	293.81
Isg15	NM_015783.1	NM_015783.1:395	Endogenous	mRNA	2405.25	93.34
Il17b	NM_019508.1	NM_019508.1:346	Endogenous	mRNA	571.40	21.42
Oasl1	NM_145209.3	NM_145209.3:626	Endogenous	mRNA	134.62	3.06
Il1rn	NM_031167.5	NM_031167.5:224	Endogenous	mRNA	584.36	10.71
Col1a1	NM_007742.3	NM_007742.3:215	Endogenous	mRNA	106.70	1.53
Jam3	NM_023277.4	NM_023277.4:145	Endogenous	mRNA	645.19	9.18
